# Supplementary material for: Effect of Surfactants on Association Characteristics of Di- and Triblock Copolymers of Oxyethylene and Oxybutylene in Aqueous Solutions: Dilute Solution Phase Diagrams, SANS, and Viscosity Measurements at Different Temperatures
Source: Hindawi journal article supplement (doi:10.1155/2011/570149), 2011-01-01
Supplement: f1 [file 570149.f1.pdf]

**Figure S1** Dilute aqueous solution phase diagram for block copolymers – surfactant mixtures:

a) B-1 – SDS, b) B-1 – DTAB, c) B-2 – SDS, d) B-2 – DTAB.

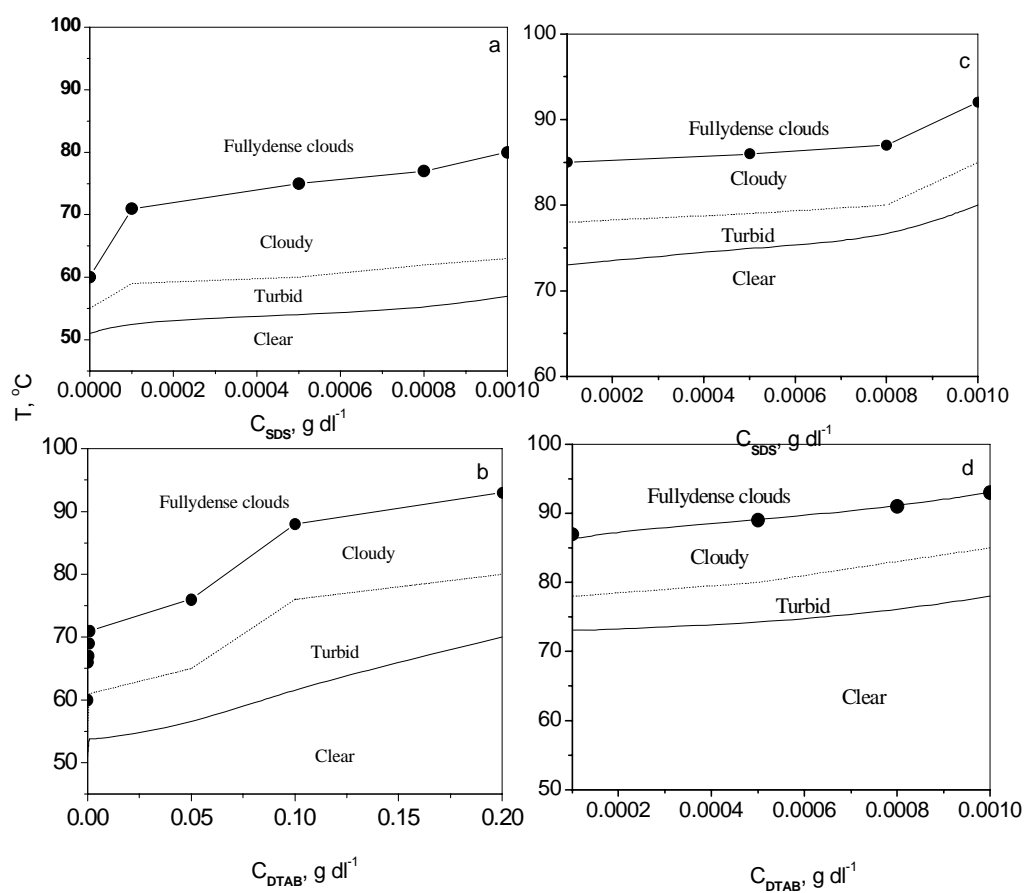

**Figure S1**
