# Supplementary material for: Effect of Surfactants on Association Characteristics of Di- and Triblock Copolymers of Oxyethylene and Oxybutylene in Aqueous Solutions: Dilute Solution Phase Diagrams, SANS, and Viscosity Measurements at Different Temperatures
Source: Hindawi journal article supplement (doi:10.1155/2011/570149), 2011-01-01
Supplement: f2 [file 570149.f2.pdf]

**Figure S2** SANS distribution for B-1( 2 % (w/v)) - surfactant mixtures in D<sub>2</sub>O at 30°C: (a) SDS: (●) 0.001 %, (□) 0.05 % , (○) 1 % ; (b) DTAB: (Δ) 0.05 % , (○) 0.1 % , (▽) 1 % ; (c) TX-100: (▽) 6 % ; at different temperature (in °C) as shown in parenthesis : (d) SDS: (○) 0.001 (56°C), (Δ) 0.05 % (67°C), (▽) 1 % (70°C); (e) DTAB: (○) 0.05 % (55°C), (Δ) 0.1 % (61°C), (▽) 1 % DTAB (70°C); (f) TX-100: (○) 0.01 % (50°C), (Δ) 3 % (53°C), (▽) 6 % (56°C). Curves represent the model fitted values.

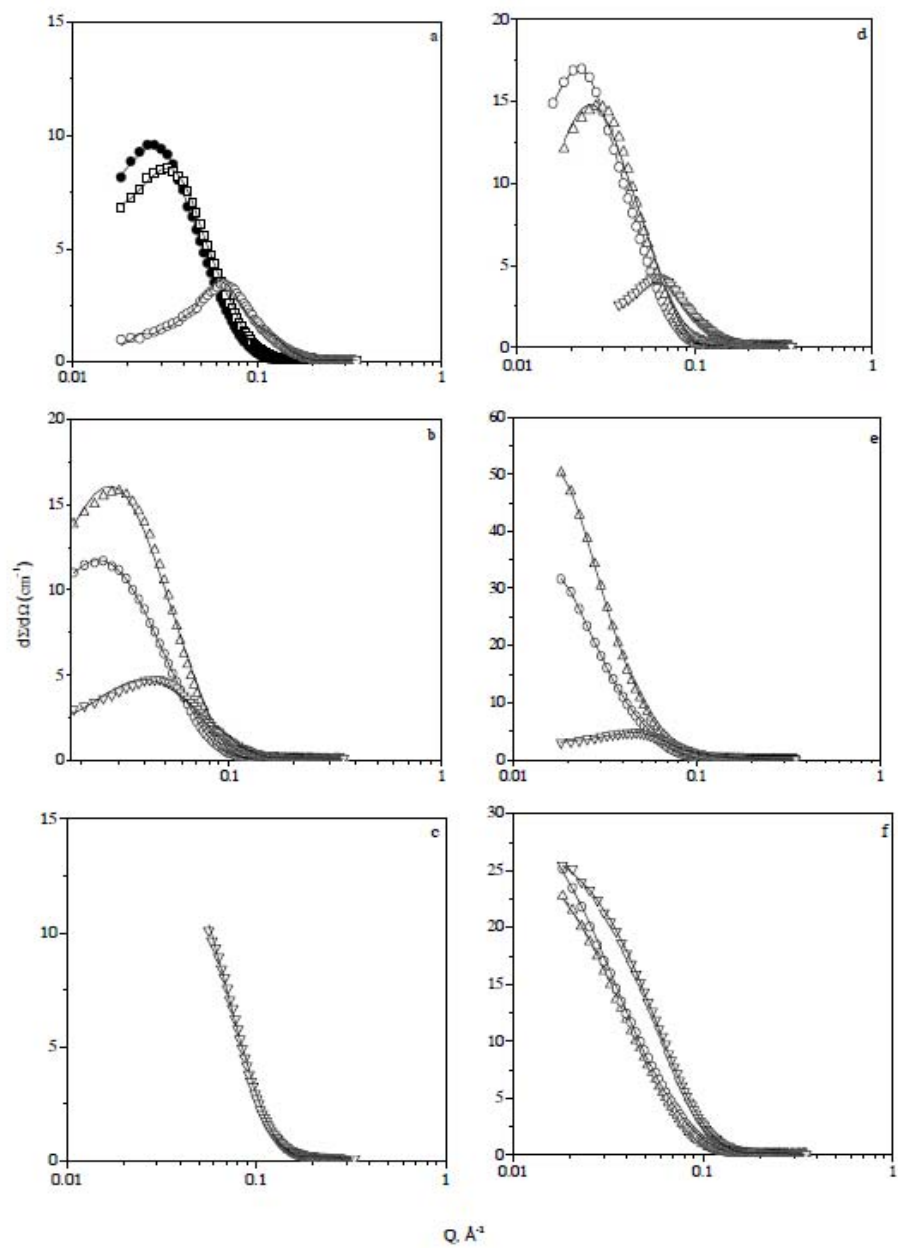

Figure S2
