# Supplementary material for: Effect of Surfactants on Association Characteristics of Di- and Triblock Copolymers of Oxyethylene and Oxybutylene in Aqueous Solutions: Dilute Solution Phase Diagrams, SANS, and Viscosity Measurements at Different Temperatures
Source: Hindawi journal article supplement (doi:10.1155/2011/570149), 2011-01-01
Supplement: f3 [file 570149.f3.pdf]

**Figure S3** SANS distribution for B-2 ( 2 % (w/v)) – surfactant (in % (w/v)) mixtures in D<sub>2</sub>O at different temperatures (in °C) as shown in parenthesis: (a) SDS: ( $\Delta$ ) 0.0005 % 74°C ( $\square$ ) 1 % 30°C, ( $\circ$ ) 0.05 % 75°C, ( $\nabla$ ) 1 % 70°C; (b) DTAB: ( $\square$ ) 1 % 30°C, ( $\circ$ ) 0.0005 % 73°C, ( $\Delta$ ) 0.1 % 75°C, ( $\nabla$ ) 1 % 75°C; (c) TX-100: ( $\square$ ) 6 % 30°C, ( $\circ$ ) 0.01 % 72°C, ( $\Delta$ ) 3 % 59°C, ( $\nabla$ ) 6 % 57°C. Curves represent the model fitted values.

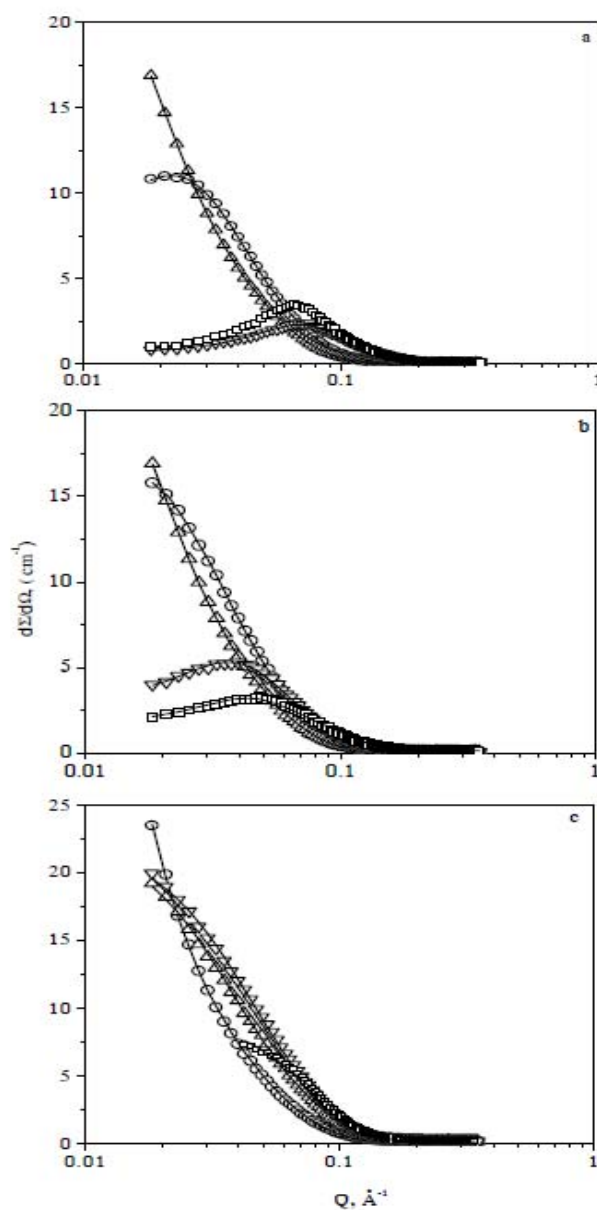

**Figure S3**
